# Supplementary material for: Electrochemically activated Cu2O/Co3O4 nanocomposites on defective carbon nanotubes for the hydrogen evolution reaction
Source: Royal Society of Chemistry journal article supplement (doi:10.1039/c8nj03790f), 2018-01-01
Supplement: c8nj03790f1.pdf [file c8nj03790f1.pdf]

Supporting Information

**Electrochemical activated  $\text{Cu}_2\text{O}/\text{Co}_3\text{O}_4$  nanocomposites on defective carbon nanotubes for hydrogen evolution reaction**

Wei Jin,\* Jianping Chen

Key Laboratory of Synthetic and Biological Colloids, Ministry of Education, School of Chemical and Material Engineering, Jiangnan University, Wuxi214122, China

\*Corresponding author: E-mail: [wjin@ipe.ac.cn](mailto:wjin@ipe.ac.cn) (Wei Jin), Tel: +86 10 62584427.

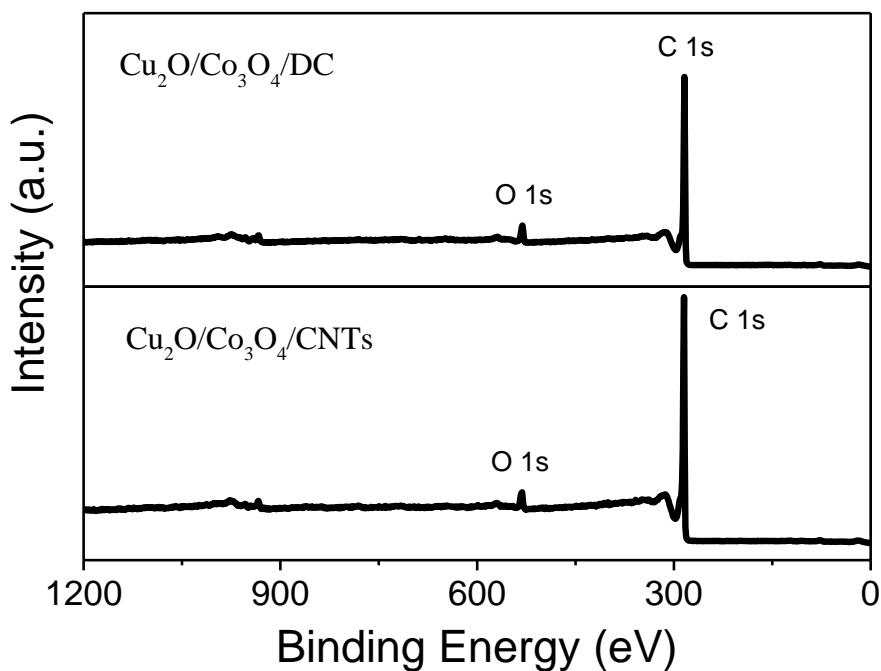

**Figure S1.** XPS survey spectrum of  $\text{Cu}_2\text{O}/\text{Co}_3\text{O}_4/\text{DC}$  and  $\text{Cu}_2\text{O}/\text{Co}_3\text{O}_4/\text{CNTs}$ .

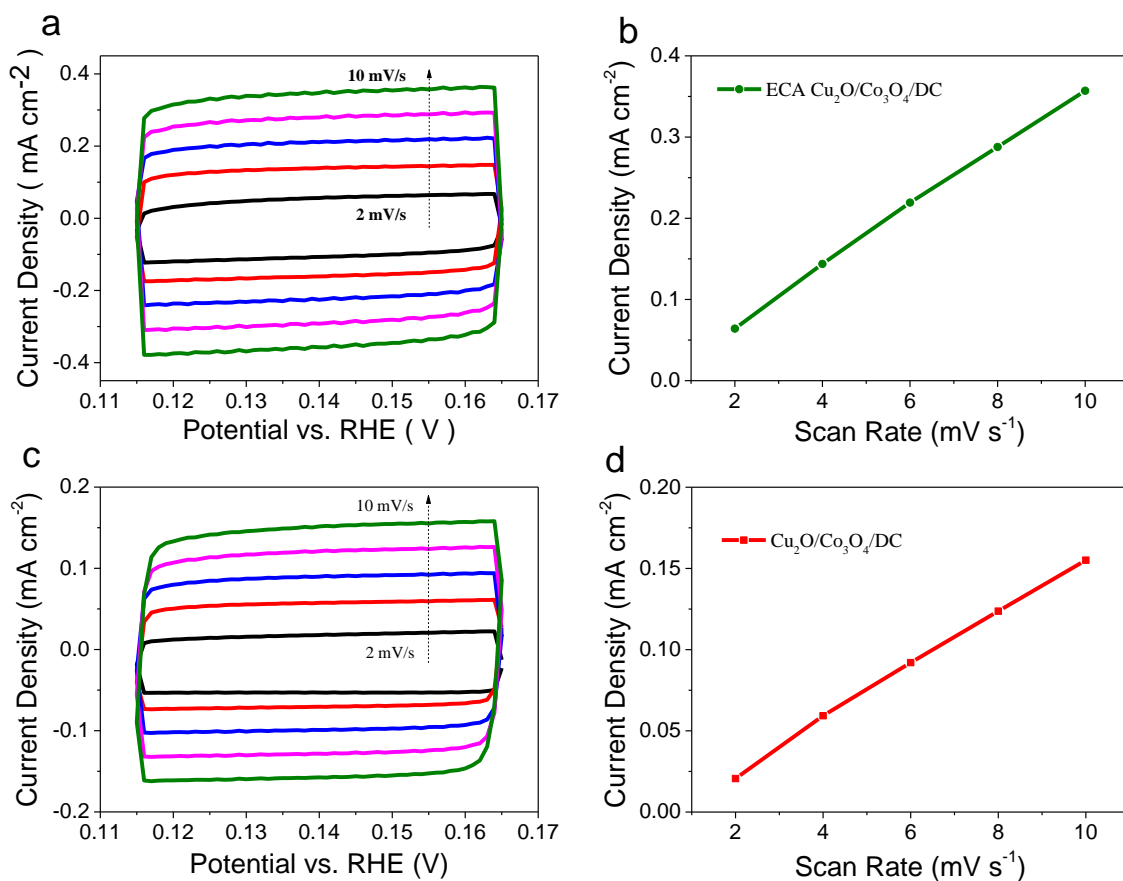

**Figure S2.** The cyclic voltammograms (CVs) curves of (a) ECA Cu<sub>2</sub>O/Co<sub>3</sub>O<sub>4</sub>/DC and (c) Cu<sub>2</sub>O/Co<sub>3</sub>O<sub>4</sub>/DC; Charging current density differences ( $\Delta j = j_a - j_c$ ) plotted against scan rates: (b) ECA Cu<sub>2</sub>O/Co<sub>3</sub>O<sub>4</sub>/DC and (d) Cu<sub>2</sub>O/Co<sub>3</sub>O<sub>4</sub>/DC.
